# Supplementary material
Source: publisher site journal article supplement (https://www.dovepress.com/article/427516)
Supplement: Supplementary file 1 [file get_supplementary_file.php]

**Appendix A. Excluded substances, according to specificities of the Swiss drugs’ market**

**Beers’ criteria**

Clonazepam was not included in the PIM list of benzodiazepine, because it is only available in Switzerland as an antiepileptic (N03AE01). Amiodarone was not included, because we did not have clinical information on comorbid conditions (considered as reasonable for maintaining sinus rhythm in presence of heart failure or ventricular hypertrophy). Desmopressin was not included because it is generally used for other conditions in Switzerland than for nycturia. Dipyridamole is not available in Switzerland and was thus not included in this modified PIM list.

**PRISCUS list**

Phenylbutazone and ticlopidine are not available in Switzerland and thus not included in PIM list.

**Laroche criteria**

We did not include cimetidine in the PIM list, since it is not available in Switzerland.

**Appendix B. Comparison of different approaches for NSAIDs (except indomethacin), sleeping pills and anxiolytics and rationale for the composite indicator**

| PIM Classes | ATC | Labels | Beers | PRISCUS | Laroche | NORGEP | Prescrire | Rankinga |
| --- | --- | --- | --- | --- | --- | --- | --- | --- |
| Other NSAIDs | M01AB05 | diclofenac | PIM |  | PIM if > 1 | PIM | PIM | 1 |
| Other NSAIDs | M01AE01 | ibuprofen | PIM |  | PIM if > 1 | PIM |  | 2 |
| Other NSAIDs | M01AB11 | acemetacine |  | PIM | PIM if > 1 | PIM |  | 3 |
| Other NSAIDs | M01AG01 | mefenamic acid | PIM |  | PIM if > 1 | PIM | PIM | 4 |
| Other NSAIDs | M01AH01 | celecoxib |  |  | PIM if > 1 | PIM | PIM | 5 |
| Other NSAIDs | M01AH05 | etoricoxib |  | PIM | PIM if > 1 | PIM |  | 6 |
| Other NSAIDs | M01AB55 | diclofenac, combinaisons | PIM |  | PIM if > 1 | PIM |  | 7 |
| Other NSAIDs | M01AE02 | naproxen | PIM |  | PIM if > 1 | PIM |  | 8 |
| Other NSAIDs | M01AB08 | etodolac | PIM |  | PIM if > 1 | PIM |  | 9 |
| Other NSAIDs | M01AX17 | nimesulide |  |  | PIM if > 1 | PIM |  | 10 |
| Other NSAIDs | M01AC01 | piroxicam | PIM | PIM | PIM if > 1 | PIM |  | 11 |
| Other NSAIDs | M01AC05 | lornoxicam |  |  | PIM if > 1 | PIM | PIM | 12 |
| Other NSAIDs | M01AC02 | tenoxicam |  |  | PIM if > 1 | PIM | PIM | 13 |
| Other NSAIDs | M01AE14 | dexibuprofen |  |  | PIM if > 1 | PIM |  | 14 |
| Sleeping pills | N05CF02 | zolpidem | PIM | PIM | PIM |  |  | 1 |
| Sleeping pills | N05CF01 | zopiclone |  | PIM | PIM | PIM |  | 2 |
| Sleeping pills | N05CD01 | flurazepam | PIM | PIM |  |  |  | 3 |
| Sleeping pills | N05CD08 | midazolam |  |  |  |  |  | 4 |
| Sleeping pills | N05CD06 | lormetazepam |  | PIM | PIM |  |  | 5 |
| Sleeping pills | N05CD02 | nitrazepam |  | PIM | PIM | PIM |  | 6 |
| Sleeping pills | N05CD07 | temazepam | PIM | PIM | PIM |  |  | 7 |
| Sleeping pills | N05CD03 | flunitrazepam |  | PIM | PIM | PIM |  | 8 |
| Sleeping pills | N05CD05 | triazolam | PIM | PIM | PIM |  |  | 9 |
| Anxiolytics | N05BA06 | lorazepam | PIM | PIM |  |  |  | 1 |
| Anxiolytics | N05BA12 | alprazolam | PIM | PIM | PIM |  |  | 2 |
| Anxiolytics | N05BA04 | Oxazepam | PIM | PIM | PIM | PIM |  | 3 |
| Anxiolytics | N05BA08 | bromazepam |  | PIM | PIM |  |  | 4 |
| Anxiolytics | N05BA05 | potassium clorazepate | PIM | PIM | PIM |  |  | 5 |
| Anxiolytics | N05BB01 | hydroxyzine | PIM | PIM |  | PIM |  | 6 |
| Anxiolytics | N05BA01 | Diazepam | PIM | PIM | PIM | PIM |  | 7 |
| Anxiolytics | N05BA11 | Prazepam |  | PIM | PIM |  |  | 8 |
| Anxiolytics | N05BA09 | Clobazam |  | PIM | PIM |  |  | 9 |
| Anxiolytics | N05BA10 | Ketazolam |  |  |  |  |  | 10 |

aRanking, from the most frequent to the rarest in the PIM classes.

There are many convergences between the lists of other NSAIDs, sleeping pills and anxiolytics, but also some divergences. For instance, ibuprofen and loprazolam appear in the Beers list but not in the Priscus one. Inversely, acemetacin and nitrazepam are in the Priscus list but not in the Beers one. Such differences might occur because some substances are present or absent in specific national drugs’ markets. Because we did found rationales to justify these differences, we included analogue substances attached to each class of PIM in the composite indicator.

We considered “other NSAID”, acetylsalicylic acid and furantoin as PIM if the duration of treatment was more than 90 days of treatment per year (derived from DDD), based on the definition of “chronic or long term” use. We considered that NSAIDs can be first-line drugs in the treatment of pain as long as it is of short duration. [1,2,3]

To avoid dependence, sleeping and anxiolytic treatment with benzodiazepines and analogs should not exceed 4 weeks [4]; we thus considered them as PIM if exceeding 30 days of treatment per year.

We extended the analysis to all ages for benzodiazepines and analogue substances, to indomethacin and acetylsalicylic acid (chronic high doses use) classes. The rationale behind that is that those medications are not recommended as first line therapy, independently of drugs’ interaction or health status.

Antispasmodic and other anticholinergic drugs were considered as PIM only being used in nursing homes, because it might contribute to the quality of life of patients living at home if they do not suffer from too severe comorbidities [5].

Except amitriptyline, all tricyclic anti-depressants were also included. The list of anticholinergic substances included all drugs with a high or moderate anticholinergic burden [6]. Stimulating laxative were considered as PIM only if not associated with opiates (causing constipation).

We applied the doses limits specified in the Beers list (more than 0.125 mg for digoxine for instance).

*References of appendix A*

[1] AGS Panel on Pharmacological Management of Persistent Pain in Older Persons Pharmacological management of persistent pain in older persons, J Am Geriatr Soc 2009 Aug;57(8):1331-1346.

# [2] [Solomon, DH](https://jamanetwork.com/searchresults?author=Daniel+H.+Solomon&q=Daniel+H.+Solomon), [Rassen JA](https://jamanetwork.com/searchresults?author=Jeremy+A.+Rassen&q=Jeremy+A.+Rassen), [Glynn RJ](https://jamanetwork.com/searchresults?author=Robert+J.+Glynn&q=Robert+J.+Glynn). The Comparative Safety of Analgesics in Older Adults With Arthritis Arch Intern Med 2010;170(22):1968-1978.

# [3] [Pautex S,](https://www.revmed.ch/auteurs/pautex-sophie) [Vogt-Ferrier](https://www.revmed.ch/auteurs/vogt-ferrier-nicole) N. Prise en charge de la douleur chronique chez la personne âgée. Rev Med Suisse 2006;2: 1629-1633.

[4] Riemann D, Baglioni C, Bassetti C, Bjorvatn B, Groselj LD, Ellis JG, Espie CA et al. European guideline for the diagnosis and treatment of insomnia. J Sleep Res 2017;26(6):675-700.

[5] Ness J, Hoth A, Barnett MJ, Shorr RI, Kaboli PJ. Anticholinergic medications in community-dwelling older veterans: prevalence of anticholinergic symptoms, symptom burden, and adverse drug events. Am J Geriatr Pharmacother 2006;4(1):42-51. doi: 10.1016/j.amjopharm.2006.03.008.

[6] Salahudeen MS, Duffull SB, Nishtala PS. Anticholinergic burden quantified by anticholinergic risk scales and adverse outcomes in older people: a systematic review. BMC Geriatr 2015;15:31.

**Appendix C. Substances of Prescrire® list, not mentioned in other lists: see Appendix B (2020)**

| ATC | Labels | Number of prescriptions | |
| --- | --- | --- | --- |
| All ages | Age > 64 |
| N06AB10 | Escitalopram | 3631 | 811 |
| A03FA03 | Domperidon | 2588 | 458 |
| N06AX16 | Venlafaxine | 1378 | 295 |
| N06AX21 | Duloxetine | 1293 | 280 |
| A10BD07 | Metformin et sitagliptin | 1196 | 564 |
| C09CA08 | Olmesartan medoxomil | 916 | 424 |
| N06AB04 | Citalopram | 896 | 376 |
| C09DB02 | Olmesartan medoxomil and amlodipin | 531 | 225 |
| C09DA08 | Olmesartan medoxomil and diuretics | 475 | 233 |
| C09DX03 | Olmesartan medoxomil, amlodipin and hydrochlorothiazid | 439 | 198 |
| C10AB05 | Fenofibrate | 395 | 157 |
| N06AX12 | Bupropion | 341 | 26 |
| A10BH01 | Sitagliptin | 290 | 170 |
| N06AX22 | Agomelatin | 281 | 52 |
| J01MA14 | Moxifloxacin | 243 | 79 |
| A10BH05 | Linagliptin | 159 | 118 |
| A08AB01 | Orlistat | 153 | 9 |
| A10BD11 | Metformin and linagliptin | 106 | 61 |
| A10BD08 | Metformin and vildagliptin | 92 | 56 |
| A06AX05 | Prucalopride | 88 | 20 |
| C09XA52 | Aliskirene and hydrochlorothiazid | 67 | 44 |
| C01EB17 | Ivabradin | 63 | 33 |
| C09XA02 | Aliskiren | 55 | 32 |
| A10BD10 | Metformin and saxagliptin | 53 | 28 |
| C01DX16 | Nicorandil | 40 | 32 |
| R01BA02 | Pseudoephedrin | 40 | 9 |
| C01EB18 | Ranolazin | 35 | 23 |
| N07CA03 | Flunarizin | 33 | 4 |
| R05CB06 | Ambroxol | 28 | 9 |
| C10AB02 | Bezafibrate | 27 | 14 |
| A10BH03 | Saxagliptin | 24 | 16 |
| A10BH02 | Vildagliptin | 22 | 18 |
| A10BG03 | Pioglitazon | 15 | 10 |
| L04AA31 | Tériflunomid | 13 | 3 |
| C01BD07 | Dronedaron | 12 | 9 |
| G03XB02 | Ulipristal | 10 | 0 |
| A10BD05 | Metformin and pioglitazon | 9 | 4 |
| G03AD02 | Ulipristal | 9 |  |
| R03DX07 | Roflumilast | 5 | 5 |
| A10BD13 | Metformin and alogliptin | 3 | 1 |
| A10BH04 | Alogliptin | 2 | 2 |
| G03XC02 | Bazedoxifen | 2 | 2 |
| G04BX14 | Dapoxetin | 2 | 0 |
